# Supplementary material
Source: publisher figshare collection journal article supplement (https://tandf.figshare.com/ndownloader/files/19961060)
Supplement: Supplementary file 1 [file 19961060]

**Supplementary Material**

Synthesis and spectral characterization of metal complexes of Schiff base derived from indole-3-carboxaldehyde and L-histidine as potent biocides

R. RESHMA, R. SELWIN JOSEYPHUS*, ARISH DASAN and LIJI JOHN


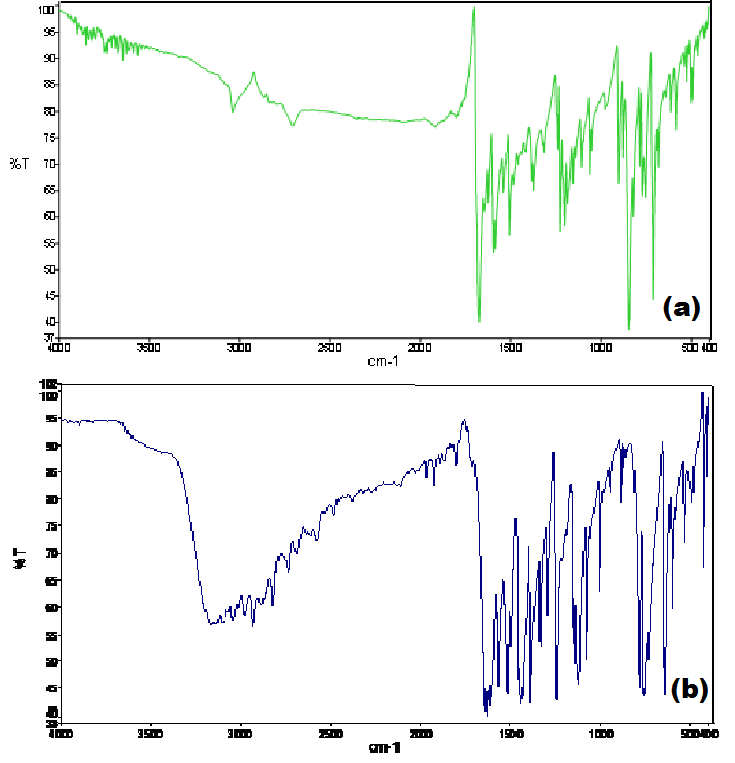


Figure S1. IR spectra of (a) [Mn(II)-(indal-L-his)2(H2O)2] and (b) [Fe(II)-(indal-L-his)2(H2O)2].


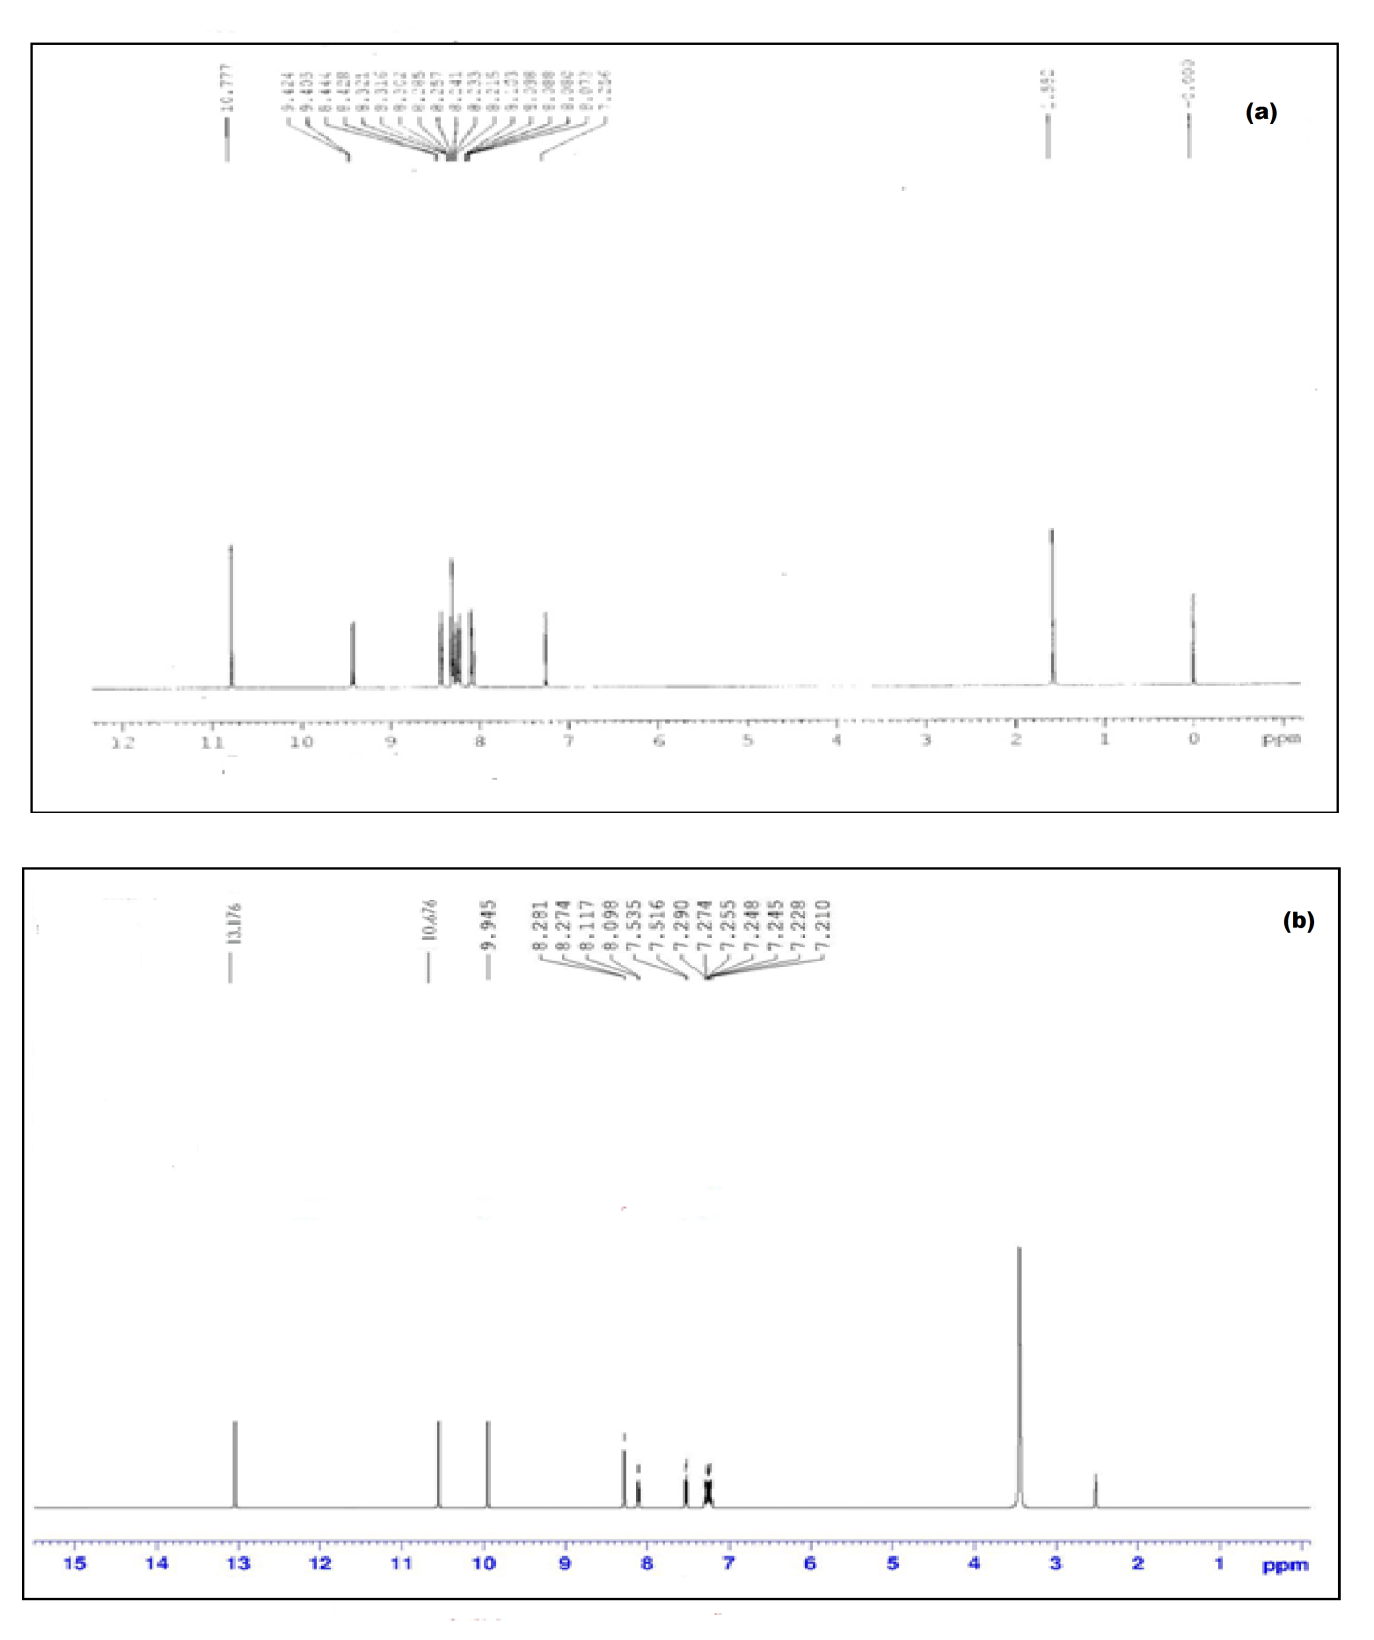


Figure S2. 1H NMR spectra of (a) indal-L-his and (b) [Zn(II)-(indal-L-his)2].


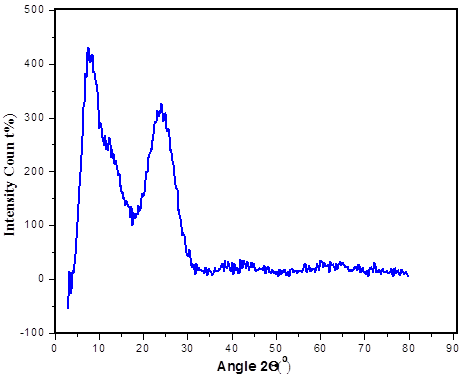


Figure S3. Powder XRD pattern of [Cu(II)-(indal-L-his)2].


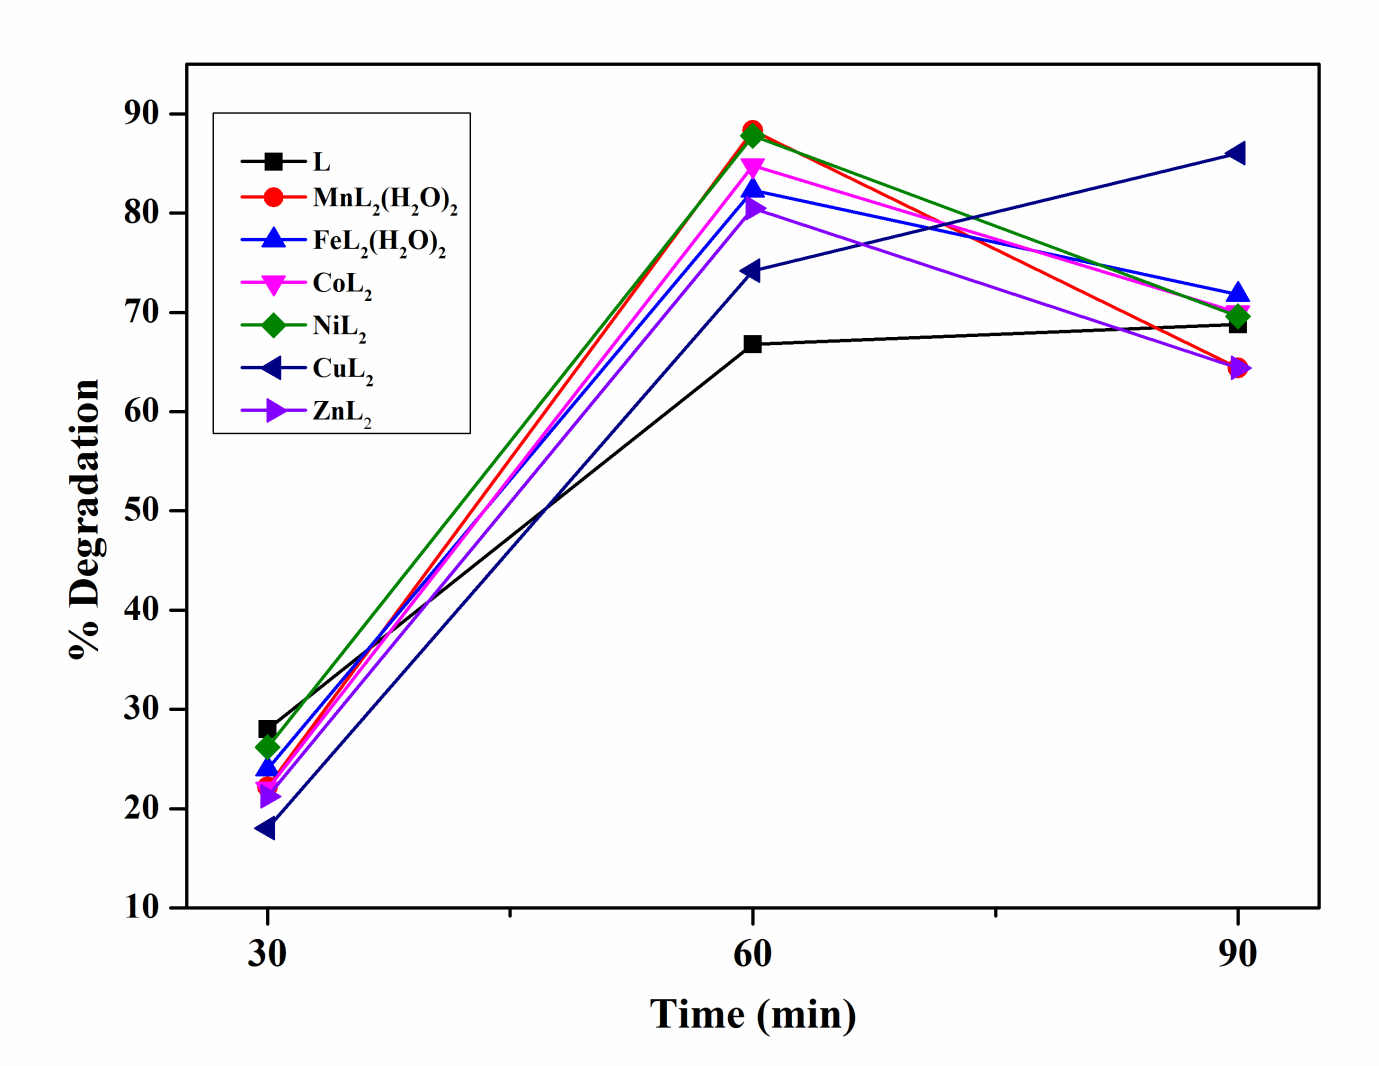


Figure S4. Photocatalytic degradation of indal-L-his (L) and its metal(II) complexes.


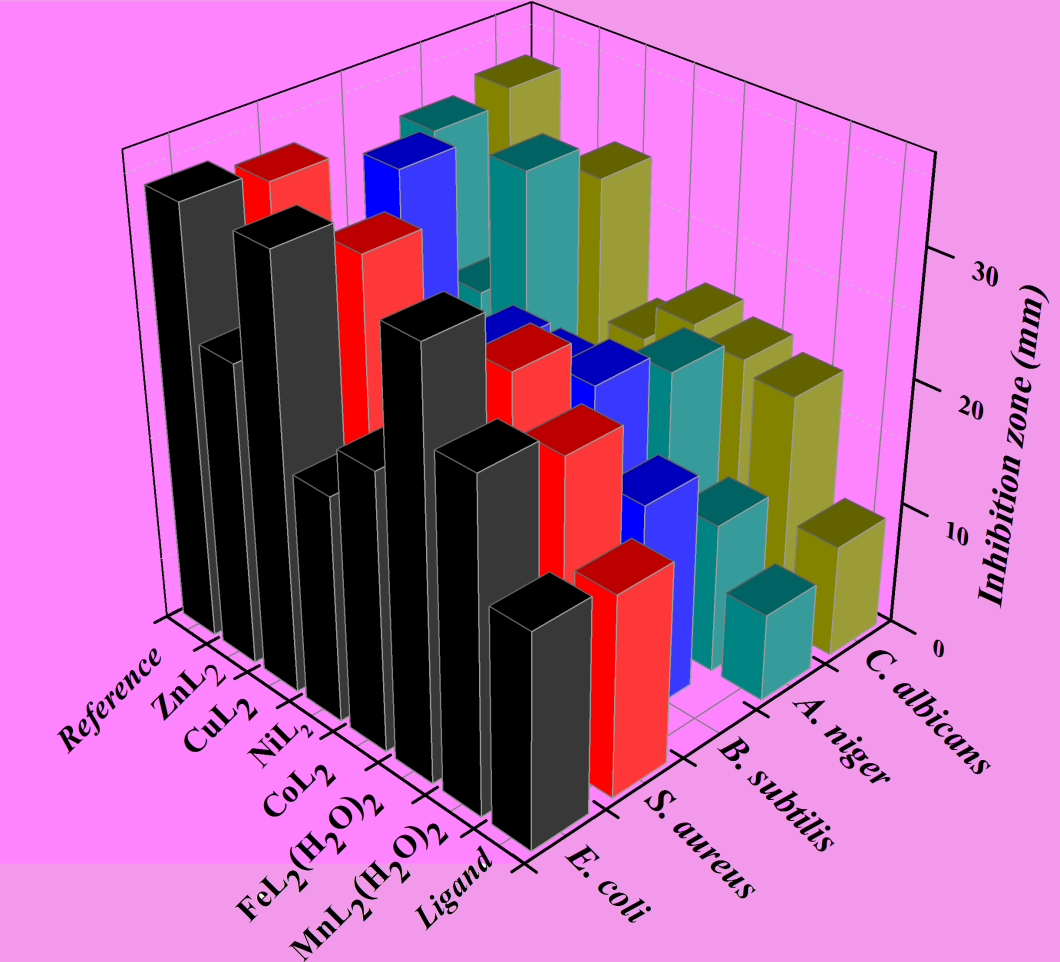


Figure S5. Antimicrobial activity of indal-L-his (L) and its metal(II) complexes.

Table S1. Molar conductance and magnetic data of metal(II) complexes.

| Metal(II) complexes | Molar conductance  (Ohm-1cm2mol-1) | eff (BM) |
| --- | --- | --- |
| [Mn(II)-(indal-L-his)2(H2O)2] | 10 | 5.89 |
| [Fe(II)-(indal-L-his)2(H2O)2 ] | 18 | 4.51 |
| [Co(II)-(indal-L-his)2] | 22 | 3.82 |
| [Cu(II)-(indal-L-his)2] | 14 | 1.99 |
| [Ni(II)-(indal-L-his)2] | 8 | Dia |
| [Zn(II)-(indal-L-his)2] | 12 | Dia |
